# Supplementary material for: The use of the reverse shock index to identify high-risk trauma patients in addition to the criteria for trauma team activation: a cross-sectional study based on a trauma registry system
Source: PubMed Central journal article supplement — BMJ Open. 2016 Jun 21;6(6):e011072. doi: 10.1136/bmjopen-2016-011072 (PMC4916635; doi:10.1136/bmjopen-2016-011072), 2016-06-21
Supplement: bmjopen-2016-011072supp_table.pdf [file bmjopen-2016-011072supp_table.pdf]

Supplementary Table 1 (18-65 years old)

| Variable                 | Regular patients<br>with RSI < 1<br>n=158 | Regular patients<br>with RSI ≥ 1<br>n=11429 | TTA patients<br>n=1526 | OR (95%CI)<br>Regular patients with RSI < 1<br>vs regular patients with RSI ≥ 1 | p      | OR (95%CI)<br>Regular patients with RSI < 1<br>vs TTA patients | p      |
|--------------------------|-------------------------------------------|---------------------------------------------|------------------------|---------------------------------------------------------------------------------|--------|----------------------------------------------------------------|--------|
| <b>RSI</b>               |                                           |                                             |                        |                                                                                 |        |                                                                |        |
| Mean                     | 0.8±0.1                                   | 1.8±0.5                                     | 1.5±0.6                | —                                                                               | <0.001 | —                                                              | <0.001 |
| Range                    | 0.0~0.9                                   | 1.0~9.5                                     | 0.0~8.1                | —                                                                               | —      | —                                                              | —      |
| <b>Gender</b>            |                                           |                                             |                        |                                                                                 |        |                                                                |        |
| Male                     | 110(69.6)                                 | 7089(62.0)                                  | 1087(71.2)             | 1.4(1.00-1.97)                                                                  | 0.059  | 0.9(0.65-1.32)                                                 | 0.712  |
| Female                   | 48(30.4)                                  | 4340(38.0)                                  | 439(28.8)              | 0.7(0.51-1.00)                                                                  | 0.059  | 1.1(0.76-1.54)                                                 | 0.712  |
| Alcohol ≥ 50 mg/dL       | 31(19.6)                                  | 644(5.6)                                    | 364(23.9)              | 4.1(2.74-6.10)                                                                  | <0.001 | 0.8(0.52-1.17)                                                 | 0.278  |
| <b>BAC level (mg/dL)</b> |                                           |                                             |                        |                                                                                 |        |                                                                |        |
| Mean                     | 141.4±80.6                                | 158.1±93.3                                  | 168.7±97.8             | —                                                                               | 0.278  | —                                                              | 0.095  |
| Range                    | 5.0~290.3                                 | 0.2~414.6                                   | 0.5~443.1              | —                                                                               | —      | —                                                              | —      |
| <b>ISS</b>               |                                           |                                             |                        |                                                                                 |        |                                                                |        |
| 1-8                      | 73(46.2)                                  | 7178(62.8)                                  | 349(22.9)              | 0.5(0.37-0.70)                                                                  | <0.001 | 2.9(2.07-4.05)                                                 | <0.001 |
| 9-15                     | 42(26.6)                                  | 3249(28.4)                                  | 397(26.0)              | 0.9(0.64-1.30)                                                                  | 0.654  | 1.0(0.71-1.49)                                                 | 0.850  |
| 16-24                    | 29(18.4)                                  | 788(6.9)                                    | 422(27.7)              | 3.0(2.02-4.57)                                                                  | <0.001 | 0.6(0.39-0.89)                                                 | 0.011  |
| ≥25                      | 14(6.9)                                   | 214(1.9)                                    | 358(23.5)              | 5.1(2.90-8.97)                                                                  | <0.001 | 0.3(0.18-0.56)                                                 | <0.001 |
| Mortality                | 3(1.9)                                    | 35(0.3)                                     | 152(10.0)              | 6.3(1.92-20.71)                                                                 | 0.015  | 0.2(0.06-0.56)                                                 | <0.001 |
| ISS+Age (AOR)            | —                                         | —                                           | —                      | 4.3(1.21-14.91)                                                                 | 0.024  | 0.4(0.12-1.31)                                                 | 0.131  |
| Hospital LOS (days)      | 13.3±12.7                                 | 8.4±8.8                                     | 15.9±16.1              | —                                                                               | <0.001 | —                                                              | 0.016  |
| ICU stay                 | 46(29.1)                                  | 1394(12.2)                                  | 827(54.2)              | 3.0(2.09-4.19)                                                                  | <0.001 | 0.3(0.24-0.50)                                                 | <0.001 |
| ICU LOS (days)           | 8.3±10.0                                  | 8.4±10.6                                    | 10.4±13.0              | —                                                                               | 0.955  | —                                                              | 0.293  |
